# Supplementary material for: Immunostimulatory Effects of Chitooligosaccharides on RAW 264.7 Mouse Macrophages via Regulation of the MAPK and PI3K/Akt Signaling Pathways
Source: PubMed Central journal article supplement (PMC6357175; doi:10.3390/md17010036), 2019-01-08
Supplement: marinedrugs-17-00036-s001.pdf [file marinedrugs-17-00036-s001.pdf]

# Immunostimulatory Effects of Chitooligosaccharides on RAW 264.7 Mouse Macrophages via Regulation of the MAPK and PI3K/Akt Signaling Pathways

Yue Yang <sup>1,2,3,4</sup>, Rong Xing <sup>1,2,4,\*</sup>, Song Liu <sup>1,2,4</sup>, Yukun Qin <sup>1,2,4</sup>, Kecheng Li <sup>1,2,4</sup>, Huahua Yu <sup>1,2,4</sup> and Pengcheng Li <sup>1,2,4,\*</sup>

- <sup>1</sup> Key Laboratory of Experimental Marine Biology, Institute of Oceanology, Chinese Academy of Sciences, No. 7 Nanhai Road, Qingdao 266071, China; yy100462@163.com (Y.Y.); sliu@qdio.ac.cn (S.L.); ykqin@qdio.ac.cn (Y.Q.); lkc@qdio.ac.cn (K.L.); yuhuahua@qdio.ac.cn (H.Y.)
  - <sup>2</sup> Laboratory for Marine Drugs and Bioproducts of Qingdao National Laboratory for Marine Science and Technology, No. 1 Wenhai Road, Qingdao 266237, China
  - <sup>3</sup> College of earth and planetary sciences, University of Chinese Academy of Sciences, Beijing 100049, China
  - <sup>4</sup> Center for Ocean Mega-Science, Chinese Academy of Sciences, 7 Nanhai Road, Qingdao 266071, China
- \* Correspondence: xingronge@qdio.ac.cn (R.X.); pcli@qdio.ac.cn (P.L.); Tel.: +86-532-8289-8707 (P.L.); Fax: +86-532-8296-8780 (R.X.)

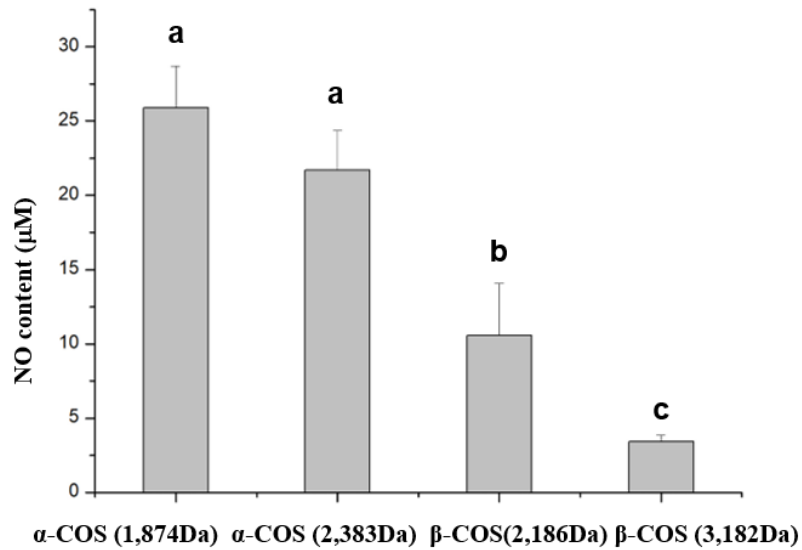

**Figure S1.** Nitric oxide production treated with  $\alpha$ -chitooligosaccharide ( $\alpha$ -COS) and  $\beta$ -chitooligosaccharide ( $\beta$ -COS) at the concentration of 100  $\mu\text{g}/\text{mL}$ . The values are presented as means  $\pm$  SD ( $n = 3$ ). Values with the same superscript letters were not significantly different from each other at  $p < 0.05$ .

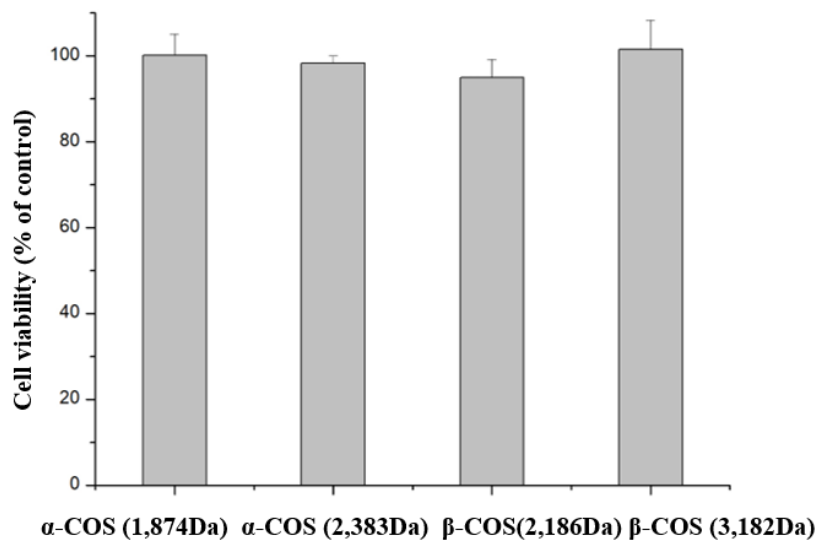

**Figure S2.** The cell viability treated with  $\alpha$ -COS and  $\beta$ -COS at the concentration of 100  $\mu\text{g}/\text{mL}$ . The values are presented as means  $\pm$  SD ( $n = 3$ ).

**Table 1** The primer sequences and conditions for RT-PCR

| Genes         | Primer Sequence (5'-3')                                        | Denaturation | Annealing   | Extension   | Cycles |
|---------------|----------------------------------------------------------------|--------------|-------------|-------------|--------|
| GAPDH         | F: ACTCACGGCAAATTCAACGGCA<br>R: GACTCCACGACATACTCAGCAC         |              | 60 °C, 30 s |             | 25     |
| iNOS          | F: CCCTCCGAAGTTTCTGGCAGCAG<br>R: GGCTGTCAGAGCCTCGTGGCTTTGG     |              | 55 °C, 30 s |             | 25     |
| COX-2         | F: CACTACATCCTGACCCACTT<br>R: ATGCTCCTGCTTGAGTATGT             | 94 °C,30 s   | 55 °C, 30 s | 72 °C, 30 s | 25     |
| TNF- $\alpha$ | F: TGCCTATGTCTCAGCCTCTTC<br>R: GAGGCCATTTGGGAACTTCT            |              | 55 °C, 30 s |             | 25     |
| IL-6          | F: ARACTTCCATCCAGTTGCCTTCTTG<br>R: CATGTGTAATTAAGCCTCCGACTTGTG |              | 55 °C, 30 s |             | 25     |
